# Supplementary material
Source: publisher figshare collection journal article supplement (https://gsajournals.figshare.com/ndownloader/files/13173407)
Supplement: Supplementary file 1 [file 13173407]

	condition	trait	broadsense_H2	narrowsense_h2	narrowsense_h2_SE	interaction_VE	interaction_SE
1	cadmium	PC1	0.500381967211669	0.0596011407806186	0.052713823751988	0.0256415586844133	0.106493296133769
2	cadmium	PC2	0.740978053781206	0.0989441129817695	0.0645849545175489	0	0
3	cadmium	PC3	0.455367140897408	0.124259836114426	0.0723990780388114	0.0213410813719797	0.102402567066251
4	cadmium	PC4	0.391936298576402	0.224321323846822	0.0967232826381935	0	0
5	cadmium	PC5	0.395999946003905	-0.0127039966307178	0.0233682108370359	0.0371847583143299	0.108250155070192
6	cadmium	PC6	0.417753375191403	0.034640561385792	0.0424828499936949	0	0
7	carmustine	PC1	0.0263805390269539	0.209486019745996	0.092163698030309	0	0
8	carmustine	PC2	0.638252198229847	0.103197206801336	0.0653283814529033	0	0
9	carmustine	PC3	0.354569506448736	0.143742100733028	0.0772733916084413	0.0460386284296923	0.104404763638475
10	carmustine	PC4	0.196492541844623	0.0558196287843973	0.0500418120748738	0	0
11	carmustine	PC5	0	0.0240321736584758	0.0391042073050147	0.0395073969662118	0.109552413850408
12	carmustine	PC6	0.257006879917129	0.0709220490901107	0.056161319766287	0.149663301930252	0.125999462341239
13	chlorothalonil	PC1	0.429912191637623	0.286410310858279	0.105929379166814	0	0
14	chlorothalonil	PC2	0.30474842584841	0.229429045334511	0.0944837488742159	0.0638394047692358	0.093611634164884
15	chlorothalonil	PC3	0.543476542741738	0.390936360983998	0.123630558028201	0.140643327748148	0.0919219470516703
16	chlorothalonil	PC4	0.212613662638957	0.106708013041256	0.0645685907735708	0.0801247113342171	0.104744450957533
17	chlorothalonil	PC5	0.21562261338895	0.0673458585819979	0.05174534679921	0	0
18	chlorothalonil	PC6	0	0.0740870644880877	0.0541612484089087	0.00627576662983401	0.0926931120620232
19	chlorpyrifos	PC1	0.356372219020401	0.128615881221672	0.0746891734550208	0	0
20	chlorpyrifos	PC2	0.622959244952077	0.0278405118229914	0.0408472386052341	0	0
21	chlorpyrifos	PC3	0.422891550877241	0.0859057303452698	0.0579580376734947	0	0
22	chlorpyrifos	PC4	0	0.0666730991570544	0.0567525543918486	0.237587695467771	0.146044978195583
23	chlorpyrifos	PC5	0	0.0938002507867064	0.0653407939242899	0	0
24	chlorpyrifos	PC6	0.443518902111003	0.0495081209375385	0.0510703148234686	0.149793475449388	0.135047948680035
25	chlorpyrifos	PC7	0.27655512160693	0.115686586049605	0.0684441635185087	0	0
26	cisplatin	PC1	0.557835104820083	0.251389224507858	0.101254121996995	0.00568681548277986	0.0859541097696809
27	cisplatin	PC2	0	0.0222502348258076	0.0378674556848212	0.0121135873370959	0.10147377579595
28	cisplatin	PC3	0.459183057309591	0.27835012285465	0.106781758108696	0.09565840634934	0.0998146824767958
29	cisplatin	PC4	0.582401672751657	0.0827797221842362	0.0588012561388479	0.0271462040088514	0.101803118514219
30	cisplatin	PC5	0.0450873378193574	0.0204882760405065	0.0368120733929274	0.00981912885639108	0.100507021526965
31	cisplatin	PC6	0	0.136031468785725	0.0729952061741167	0	0
32	copper	PC1	0.214992700434981	0.0477913639519793	0.0468687173661724	0	0
33	copper	PC2	0.353444967002363	0.339998307839865	0.119447997144645	0	0
34	copper	PC3	0.715543687063546	0.0150862837082127	0.0331543635587289	0	0
35	copper	PC4	0	0.17357665446386	0.0833965938724823	0.319304744853728	0.138279439095778
36	copper	PC5	0	0.0307885257232174	0.0403698890810074	0	0
37	copper	PC6	0	0.205643937477179	0.09279541015575	0.036283473720264	0.0971270454661648
38	copper	PC7	0	0.0405649486664756	0.0453126982872266	0.273556699620649	0.142477336783554
39	copper	PC8	0.680014977076267	0.0161149643669021	0.0357369224082829	0.0587893593889361	0.112197533298429
40	diquat	PC1	0.731859698546013	0.108075597275026	0.0658215484019413	0	0
41	diquat	PC2	0.411939989816786	0.0919232362022042	0.0531228847627026	0	0
42	diquat	PC3	0.151617602115009	0.0302667262072845	0.0412406708339664	0.0360915562483569	0.107355485218406
43	diquat	PC4	0.181080374652612	0.0851285963562741	0.0595815658793021	0	0
44	diquat	PC5	0.296793163968831	0.217790898294237	0.0941955805578729	0	0
45	diquat	PC6	0.338946371977437	0.0412514346585395	0.045519084202861	0.089754973500588	0.116659720456488
46	fluoxetine	PC1	0.513580010784763	0.375145018806474	0.136819121139292	0.217033307801534	0.134800300033269
47	fluoxetine	PC2	0.511751534032919	0.00365099492633702	0.0385825644195919	0.00840011791897988	0.133387472452506
48	fluoxetine	PC3	0	0.000285024756305269	0.0360990747782517	0	0
49	fluoxetine	PC4	0.766021096056916	0.0271398783953839	0.0491564055280361	0.194234823374655	0.165031238830835
50	fluoxetine	PC5	0	0.167500021362392	0.0919101612021732	0	0
51	fluoxetine	PC6	0	-0.0463121510984507	0.0109093999086902	0.0197007887369988	0.123723713672443
52	fluoxetine	PC7	0.0282078665470483	0.00921961678993032	0.0405880208930114	0	0
53	FUdR	PC1	0	0.0798981688037676	0.0602378702563447	0.0886560607726867	0.119932322358601
54	FUdR	PC2	0.255869472877832	0.0501776635216272	0.0503851677224199	0.209853206678956	0.13937349895746
55	FUdR	PC3	0.374747552203778	0.0801158298058893	0.0587725351454564	0	0
56	FUdR	PC4	0.616603128988093	-0.00719347823205195	0.0262815374200559	0.0147045829769819	0.108324599594996
57	FUdR	PC5	0.319640064154076	-0.0181123261085835	0.0202240324995801	0	0
58	FUdR	PC6	0	0.00448465158428506	0.0282469622143211	0	0
59	FUdR	PC7	0	0.0228417409861617	0.0393204358785379	0.00811972623055688	0.107686922307457
60	irinotecan	PC1	0.508813835650103	0.496504381389122	0.139398936476019	0.156436827103844	0.085880122242669
61	irinotecan	PC2	0	0.259481979839977	0.100539777798407	0.287205300443438	0.123592702876728
62	irinotecan	PC3	0.000258740483220578	0.140756833766401	0.0749292656077392	0.0738596806533061	0.104124624093616
63	irinotecan	PC4	0	0.0262507141242994	0.0382040137525198	0	0
64	irinotecan	PC5	0	0.0926251476054957	0.0617668718935481	0.16690990212708	0.122154168091342
65	mechlorethamine	PC1	0.530411593637089	0.0268991883534175	0.05199783112827	0.055885565440516	0.155078548577218
66	mechlorethamine	PC2	0.379371381596808	0.0946008578910032	0.0764157669635159	0.0269053961027521	0.146272549544122
67	mechlorethamine	PC3	0	0.0259874216717292	0.0501327483218929	0.438202521414036	0.204468444273026
68	mechlorethamine	PC4	0.0538198416720905	0.0980434763156754	0.0776719882477449	0	0
69	mechlorethamine	PC5	0.0108699909267177	-0.0136348970394946	0.0337142586154157	0	0
70	mechlorethamine	PC6	0.677010037123985	-0.0206342377390449	0.0304789466830836	0.0402885354236807	0.151682476620992
71	mechlorethamine	PC7	0.863697045080141	0.0673407756236852	0.0666905668213686	0.319026903345492	0.190612070652748
72	paraquat	PC1	0.359778019386933	0.269483475547654	0.109693883632882	0.212852057974155	0.128367275472689
73	paraquat	PC2	0	0.0482012208951104	0.0475152457414987	0	0
74	paraquat	PC3	0	0.0476380262972981	0.0514445348181605	0.0911712162473868	0.127879949998309
75	paraquat	PC4	0	0.0388778230168118	0.0478447163730641	0.274917367543533	0.153934024911217
76	paraquat	PC5	0.142366468805668	0.227960753548886	0.101358766032486	0.182727889994839	0.128471186818731
77	silver	PC1	0.453985158733193	0.260955587346342	0.105122000902859	0	0
78	silver	PC2	0.513972606828948	0.0791753182485934	0.059656167917205	0.0556669267149814	0.111706447013026
79	silver	PC3	0.146902058123267	0.18449363418144	0.0887330942047901	0.0866738152461331	0.11025225444742
80	silver	PC4	0.67253495216969	0.138968572243531	0.0770433421376779	0.0928790964536481	0.114590773400274
81	silver	PC5	0.643071571467989	0.104351836516621	0.0674467476443693	0.154523933017632	0.12637720459228
82	topotecan	PC1	0.21039303335504	0.116431818429639	0.0723622326542137	0	0
83	topotecan	PC2	0.372092237866852	0.307744835831595	0.116289880274602	0	0
84	topotecan	PC3	0	0.0063585206060918	0.0340148246154196	0	0
85	topotecan	PC4	0.29834612428785	0.0406301690596792	0.0457390752612844	0	0
86	topotecan	PC5	0.145179224921506	0.0589981807440884	0.0542075889985956	0.376591179247187	0.16252774728913
87	tunicamycin	PC1	0.698443042132702	0.587297079383405	0.148557898321363	0.022447971589383	0.0541830721644925
88	tunicamycin	PC2	0.209134035300312	0.0352995879327182	0.0400169849961879	0	0
89	tunicamycin	PC3	0	0.103267546919235	0.0624468058347643	0	0
90	tunicamycin	PC4	0	0.092877500629707	0.0600821606281676	0.139951203147451	0.114077485451351
91	tunicamycin	PC5	0.033081763956297	0.0939965733997003	0.060175938541428	0.0513489859932758	0.0995209645886275
92	vincristine	PC1	0.710783554006746	0.143633927769613	0.0841794841575543	0.212889011817886	0.151086977518945
93	vincristine	PC2	0.207375930129675	0.071023140219571	0.0627231631823408	0.0335854680908897	0.128207220301401
94	vincristine	PC3	0.469596600653463	0.0615388242081559	0.059886675854792	0.177631981116833	0.152246837191973
95	vincristine	PC4	0	0.0338377398750479	0.0494222116007889	0.209393899890778	0.158022247905772
96	vincristine	PC5	0.298934965177718	0.121360243446982	0.0790578711222938	0.130750760487166	0.141113352459885
97	vincristine	PC6	0	0.0507048582561677	0.0550970240434634	0.0025218263268625	0.123063520111206
